# Supplementary material
Source: Springer Nature journal article supplement (https://www.springermedizin.de/resource/supplementary/13063_2012_1307_MOESM3_ESM.pdf/9619774)

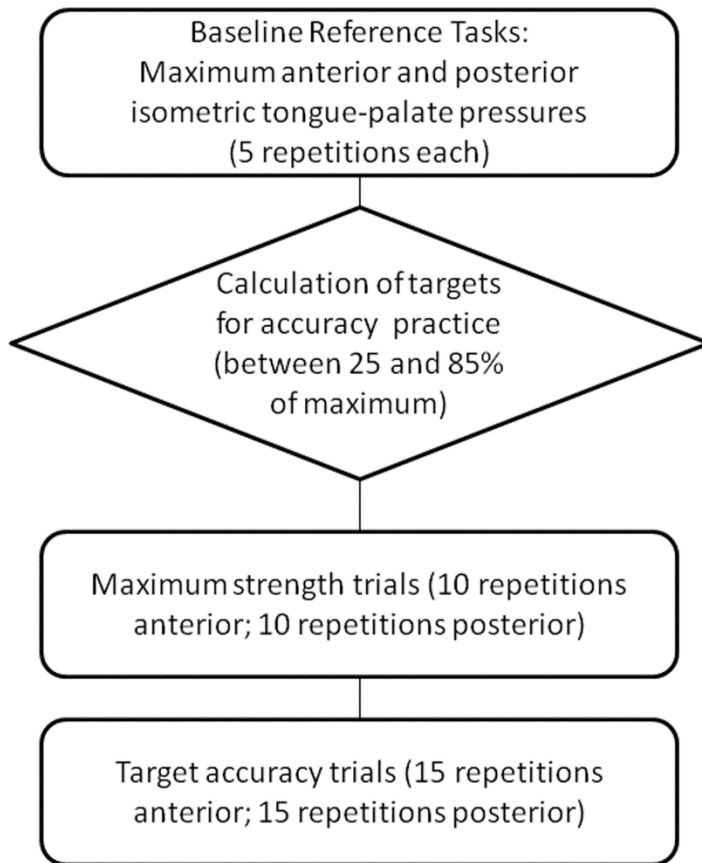

*Figure 3: Outline of a Tongue Pressure Strength and Accuracy Training session.*

Supplement: MOESM3 [file 9619774]
